# Supplementary material for: Molecular Evolution of Metallothioneins of Antarctic Fish: A Physiological Adaptation to Peculiar Seawater Chemical Characteristics
Source: MDPI journal article supplement (doi:10.3390/jmse10111592), 2022-10-28
Supplement: s1 [file s1]

# SUPPLEMENTARY TABLES

**Tab. S1.** Primers sequences used for the characterization of the MTs mRNA sequences.

| Primer            | Sequence (5'-3')                             | T <sub>m</sub> (°C) |
|-------------------|----------------------------------------------|---------------------|
| Anchor-dT         | CGGAGATCTCCAATGTGATGGGAATTC(T) <sub>17</sub> | 61.9                |
| 5'RACE kit primer | GGCCACGCGTCGACTAGTACGGGIIGGGIIGGGIIG         | 79.2                |
| TnewMTFW          | AAGAGTGGGACCTGCAACTG                         | 58.8                |
| TnewMT1RE         | TCTGAAGACATTCACAACAGCA                       | 55.3                |
| TnewMT2RE         | AGACATTGGCAACAGGAATG                         | 54.1                |
| CmawMT1RE         | TCTGAAGACATTCACAACAGCA                       | 55.3                |
| CmawMT2RE         | AGACATTGGCAACAGGAATG                         | 54.1                |
| HvelMT1RE         | AGGTCAGGCCTTTCACTGACAGC                      | 63.5                |
| HvelMT2RE         | GGCTGAGGTCCTTCACTGACAGCAGC                   | 68.0                |
| 3'RACEMT1TnewFW   | ACACAAGCTGCTGTCACT                           | 55.0                |
| 3'RACEMT2TnewFW   | TGGAGCCTTTGTGAACTACT                         | 54.6                |
| 3'RACEMT2ThanFW   | GTGCAAAGGGAAGACTTGT                          | 54.1                |
| 3'RACEMT1TeulFW   | CTGCCCCGCTTCTGACTTT                          | 57.0                |
| 3'RACEMT2TeulFW   | CCGCTTCTGCTCTGGAAT                           | 56.6                |
| 3'RACEMT1TpenFW   | TTCTGCCTTTGGGATGGA                           | 55.3                |
| 3'RACEMT1HvelFW   | GCTGTCAGTGAAAGGCCTGACC                       | 62.9                |
| 3'RACEMT2HvelFW   | GCTGACAGTGAAGGACCTCAGC                       | 62.3                |
| 5'RACEMT1TnewRE   | TAAGGGCTCCATCCCAAAG                          | 56.0                |
| 5'RACEMT2TnewRE   | CAAAGGCTCCATTCCAGGAG                         | 57.5                |
| 5'RACEMT2ThanRE   | AGGTCTTCCCTTTGCACAC                          | 56.7                |
| 5'RACEMT1TeulRE   | AAGGGCTCCATCCCAAAG                           | 56.5                |
| 5'RACEMT2TeulRE   | CTCCTGGAATGGAGCCTTTGTG                       | 60.0                |
| 5'RACEMT2TlepRE   | GCTGGTGCAGGAGCAGTT                           | 60.2                |
| 5'RACEHvelMT2RE   | CAAAATTCACCATTTCTCTG                         | 46.7                |
| 5'RACETberMT2RE   | GAAGACATTCACAACAGCAA                         | 51.8                |
| 5'RACEChamMT1RE   | ATAAGGGCTCCATCCCAAAGG                        | 56.0                |
| 5'RACEChamMT2RE   | CAAAGGCTCCATTCCAAGAG                         | 55.1                |
| 5'RACEGacutMT1RE  | GCGGCTGAGGTCTTCACT                           | 59.4                |

FW = forward primer, and RE =reverse primer; \*oligo (dT)-adapter primer.

**Tab. S2.** GenBank accession number list of species which MT sequences were examined.

| Species                              | Accession Number                                                        |
|--------------------------------------|-------------------------------------------------------------------------|
| <i>Anguilla anguilla</i>             | DQ493910 (MT-1)                                                         |
| <i>Oncorhynchus mykiss</i>           | M22487 (MT-2)                                                           |
| <i>Danio rerio</i>                   | BC049475 (MT-2)                                                         |
| <i>Gobio gobio</i>                   | AY953545 (MT-1), AY953546 (MT-2)                                        |
| <i>Carassius carassius</i>           | AY491048 (MT-1)                                                         |
| <i>Gadus morhua</i>                  | U08105                                                                  |
| <i>Oryzias latipes</i>               | AY466516                                                                |
| <i>Perca fluviatilis</i>             | X97272                                                                  |
| <i>Lithognathus mormyrus</i>         | AF321007                                                                |
| <i>Pagrus major</i>                  | AB039668                                                                |
| <i>Sparus aurata</i>                 | U58774                                                                  |
| <i>Notothenia coriiceps</i>          | AJ006484 (MT-1), AJ006485 (MT-2)                                        |
| <i>Pagothenia borchgrevinki</i>      | AJ007562 (MT-1), AJ007563 (MT-2)                                        |
| <i>Pleuragramma antarcticum</i> *    | FJ870668 (MT-1)*, FJ870669 (MT-2)*                                      |
| <i>Gobbionotothen gibberifrons</i> * | FJ870670 (MT-1)*, FJ870671 (MT-2)*                                      |
| <i>Trematomus bernacchii</i> *       | AJ011585 (MT-1), Z72485 (MT-2), FJ870672 (MT-2)*                        |
| <i>Trematomus hansonii</i> *         | FJ870679 (MT-1)*, FJ870680 (MT-2)*                                      |
| <i>Trematomus pennellii</i> *        | FJ870685 (MT-1)*, FJ870686 (MT-2)*                                      |
| <i>Trematomus newnesi</i> *          | FJ870681 (MT-1)*, FJ870682 (MT-2)*                                      |
| <i>Trematomus lepidorhinus</i> *     | FJ870677 (MT-1)*, FJ870678 (MT-2)*                                      |
| <i>Trematomus eulepidotus</i> *      | FJ870683 (MT-1)*, FJ870684 (MT-2)*                                      |
| <i>Histiodraco velifer</i> *         | FJ870689 (MT-1)*, FJ870690 (MT-2)*                                      |
| <i>Gymnodraco acuticeps</i> *        | AJ007560 (MT-1), AJ007561 (MT-2),<br>FJ870675 (MT-1)*, FJ870676 (MT-2)* |
| <i>Cygnodraco mawsoni</i> *          | FJ870687 (MT-1)*, FJ870688 (MT-2)*                                      |
| <i>Chionodraco rastrispinosus</i>    | AJ011584 (MT-1), Z72484 (MT-2)<br>Y12580 (MT-1), Y12581 (MT-2),         |
| <i>Chionodraco hamatus</i> *         | FJ870673 (MT-1)*, FJ870674 (MT-2)*                                      |
| <i>Chaenocephalus aceratus</i>       | AJ011583 (MT-1), Z72483 (MT-2)                                          |
| <i>Parachaenichthys charcoti</i>     | AJ007950 (MT-1), AJ007951 (MT-2)                                        |

The species names and the accession numbers which are indicated by symbol (\*) correspond to the MT sequences characterized in our laboratory.
